# Supplementary material for: Interleukin-1α deficiency reduces adiposity, glucose intolerance and hepatic de-novo lipogenesis in diet-induced obese mice
Source: PubMed Central journal article supplement — BMJ Open Diabetes Res Care. 2019 Oct 17;7(1):e000650. doi: 10.1136/bmjdrc-2019-000650 (PMC6827792; doi:10.1136/bmjdrc-2019-000650), 2019-10-17

**SUPPLEMENTARY DATA**

**Supplementary Figure S1. mRNA expression levels of cholesterol metabolism-related genes in the liver.** The mRNA expression levels of *hmgcr* (3-hydroxy-3-methylglutaryl-coenzyme A reductase), *cyp7a* (Cholesterol 7 alpha-hydroxylase) and *LDLR* (LDL receptor) in livers of *Loxp* and *IL-1 $\alpha$  KO* mice fed HFD for 16 weeks. Data are presented as mean  $\pm$  SE.

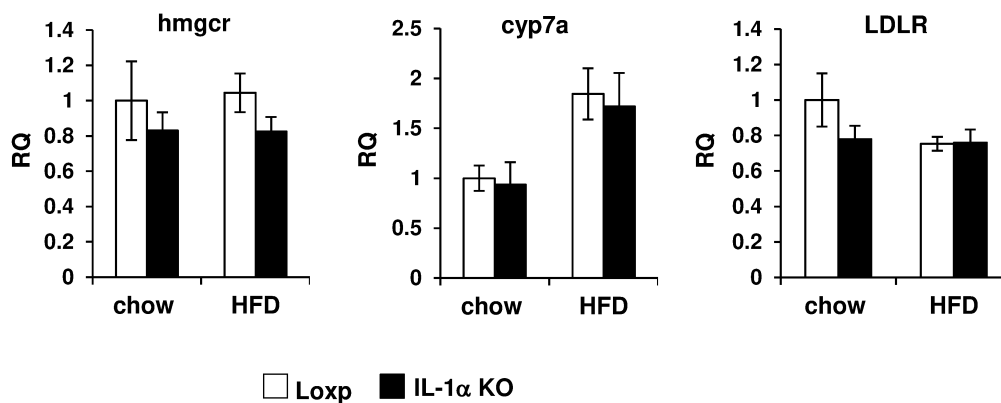

**Supplementary Figure S2. Specific deletion of *IL-1 $\alpha$*  in myeloid cells does not reduce adiposity and glucose intolerance in HFD-induced obesity**

(A) Body weight, (B) Liver weight, (C) %Liver to body weight, (D) eWAT weight (E) %eWAT to body weight (F) Serum ALT and (G) Plasma insulin levels in male *Loxp* and *LysMcre-IL-1 $\alpha$*  mice fed HFD (n = 8-10 per group) for 16 weeks and sacrificed after a 16h fast. (H) Glucose tolerance test (GTT) and (I) glucose area under curve (AUC) measured at 15 weeks of HFD after a 4h fast. (J) Fasting plasma cholesterol levels, (K) fasting plasma TG levels, (L) plasma lipoprotein cholesterol profile and (M) plasma lipoprotein TG profile in male *Loxp* and *LysMcre-IL-1 $\alpha$*  mice fed HFD (n = 8-10 per group) for 8 weeks after a 16h fast. Plasma samples were pooled in each group. Data are presented as mean  $\pm$  SE.

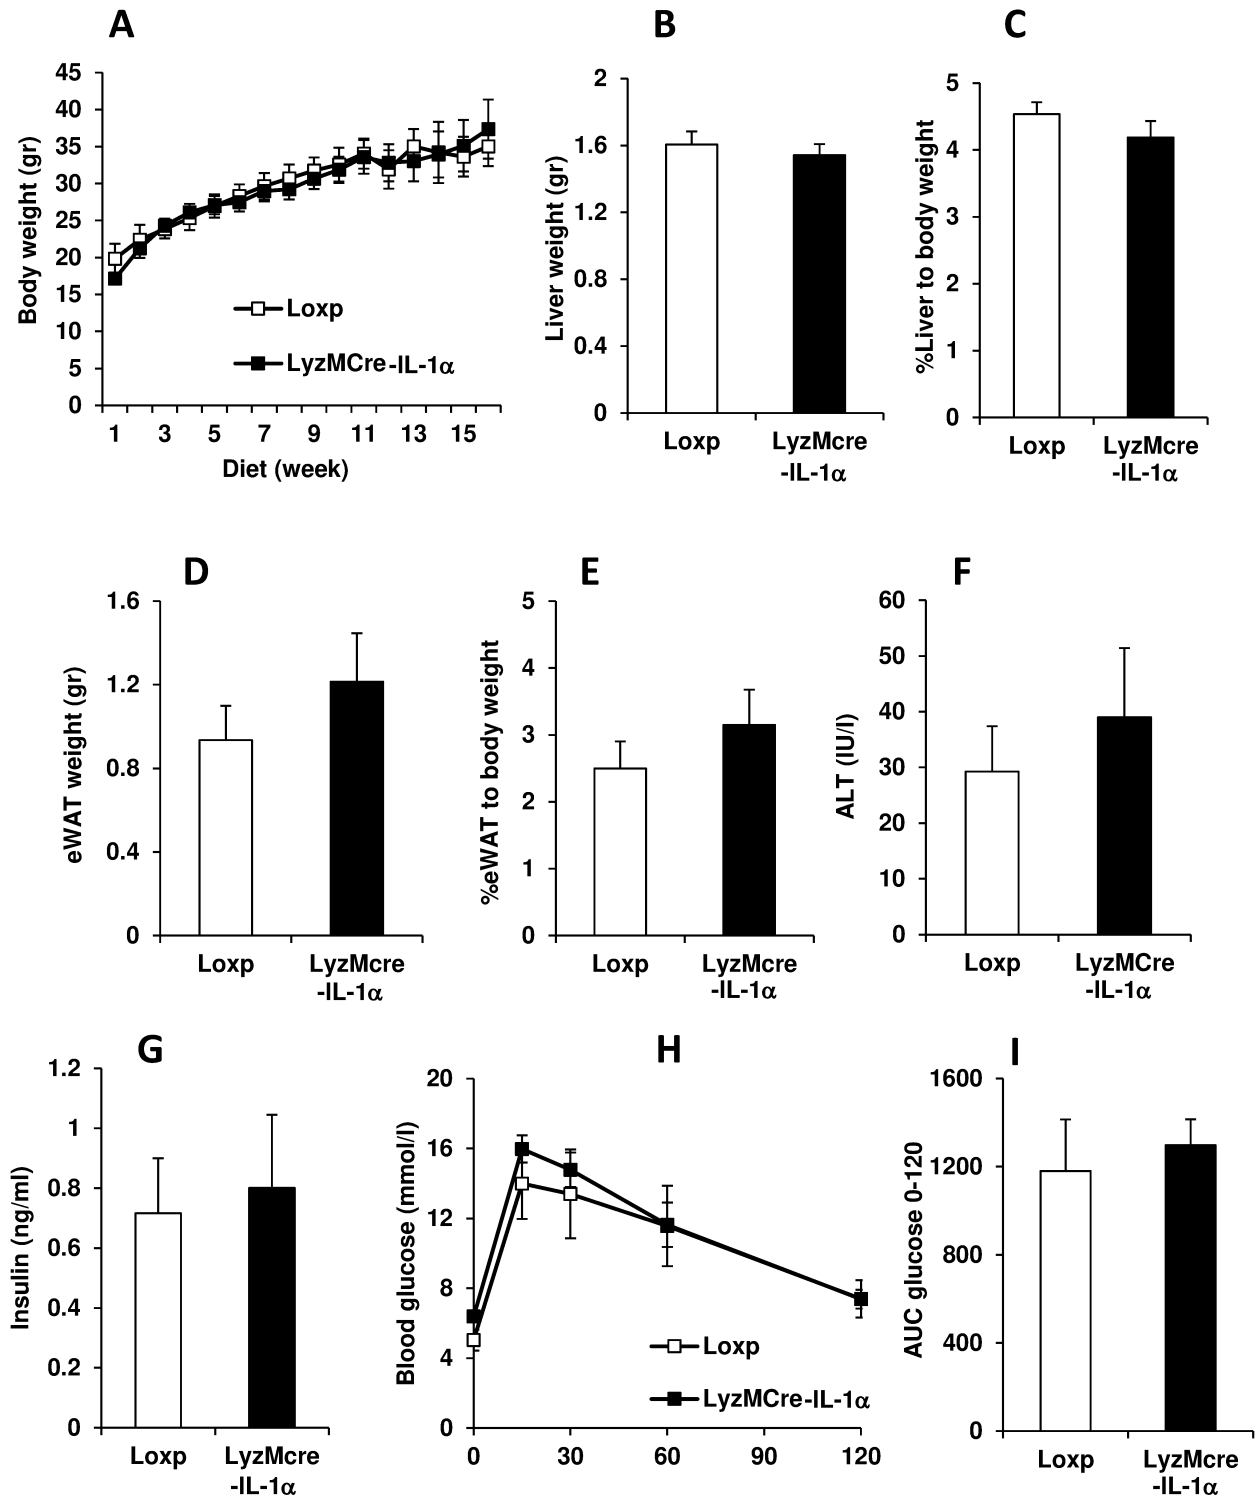

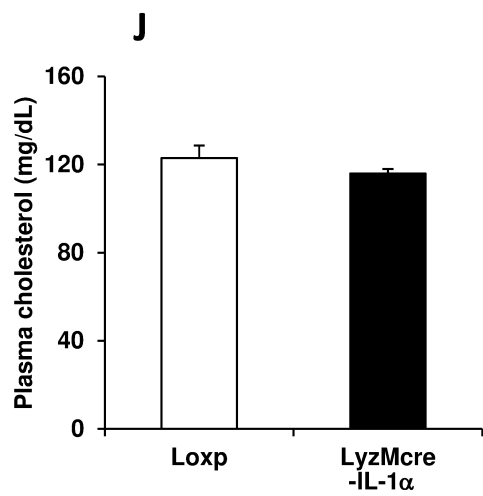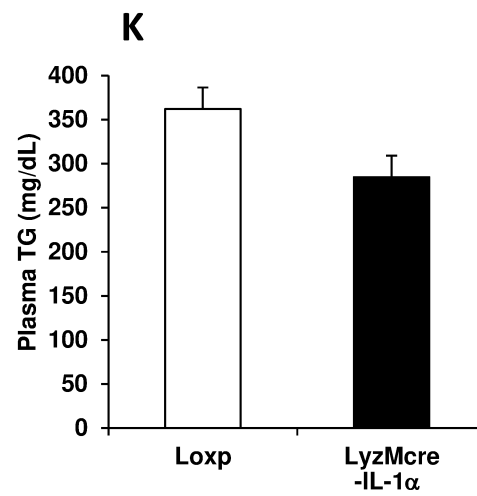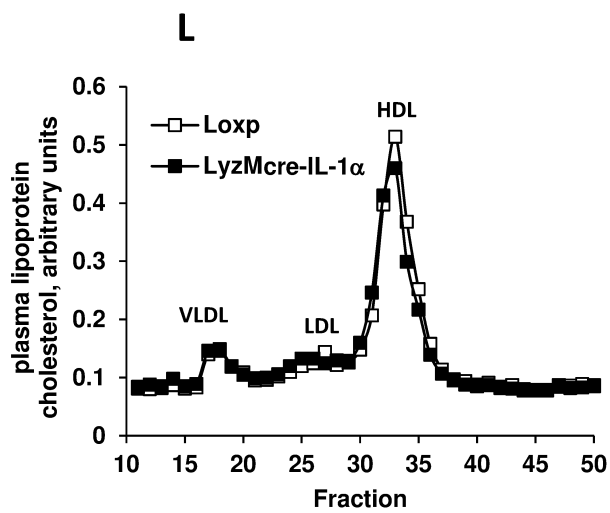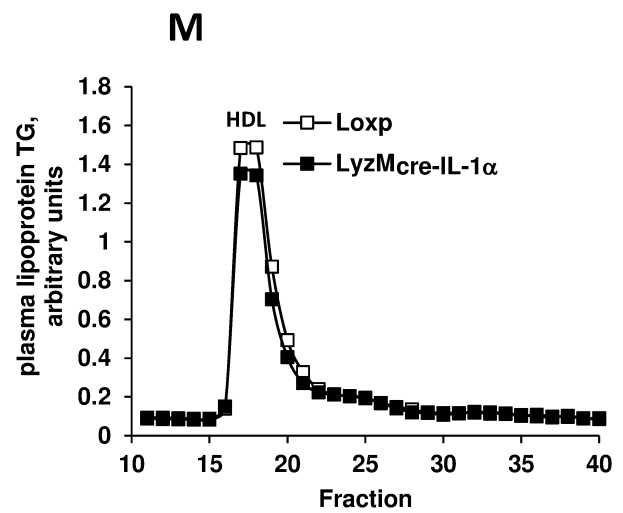

Supplement: bmjdrc-2019-000650supp001.pdf [file bmjdrc-2019-000650supp001.pdf]
